# Supplementary material for: Liquid-phase intermediated chemical vapor deposition for ternary compositional 1D van der Waals material Nb2Pd3Se8
Source: Royal Society of Chemistry journal article supplement (doi:10.1039/d4ce00451e), 2024-01-01
Supplement: d4ce00451e1.pdf [file d4ce00451e1.pdf]

## Supporting Information

# **Liquid-Phase Intermediated Chemical Vapor Deposition for Ternary Compositional 1D van der Waals Material Nb<sub>2</sub>Pd<sub>3</sub>Se<sub>8</sub>**

*Sang Hoon Lee<sup>a,†</sup>, Byung Joo Jeong<sup>a,†</sup>, Kyung Hwan Choi<sup>b</sup>, Jiho Jeon<sup>b</sup> Bom Lee<sup>a</sup>, Socheon Cho<sup>a</sup>,  
Dahoon Kim<sup>a</sup>, Gutema Teshome Gudena<sup>c</sup>, Daba Deme Megersa<sup>c</sup>, Sang Hyuk Kim<sup>a,\*</sup>, Hak Ki  
Yu<sup>c,\*</sup>, and Jae-Young Choi<sup>a,b,d,\*</sup>*

<sup>a</sup> School of Advanced Materials Science & Engineering, Sungkyunkwan University, Suwon  
16419, Republic of Korea.

<sup>b</sup> SKKU Advanced Institute of Nanotechnology (SAINT), Sungkyunkwan University, Suwon  
16419, Republic of Korea.

<sup>c</sup> Department of Materials Science and Engineering & Department of Energy Systems Research,  
Ajou University, Suwon 16499, Republic of Korea.

<sup>d</sup> KIST-SKKU Carbon-Neutral Research Center, Sungkyunkwan University, Suwon 16419,  
Republic of Korea

## **Table of contents of supplementary information**

**Fig. S1** Schematic diagram of the Nb<sub>2</sub>Pd<sub>3</sub>Se<sub>8</sub> nanowire growth using the LPI-CVD process

**Fig. S2** Morphology of precursor coated substrate.

**Fig. S3** Cross section-SEM images of Nb<sub>2</sub>Pd<sub>3</sub>Se<sub>8</sub> nanowires grown on the substrate.

**Fig. S4** XRD patterns after the LPI-CVD process at 560, 580, 600, and 620 °C

**Fig. S5** SEM images of Nb<sub>2</sub>Pd<sub>3</sub>Se<sub>8</sub> synthesized by LPI-CVD above 670 °C

**Fig. S6** Raman spectra for Nb<sub>2</sub>Pd<sub>3</sub>Se<sub>8</sub> using different synthesis methods.

**Fig. S7** XPS analysis of Nb<sub>2</sub>Pd<sub>3</sub>Se<sub>8</sub> on SiO<sub>2</sub>

**Fig. S8** Dimension of as fabricated FET channel material.

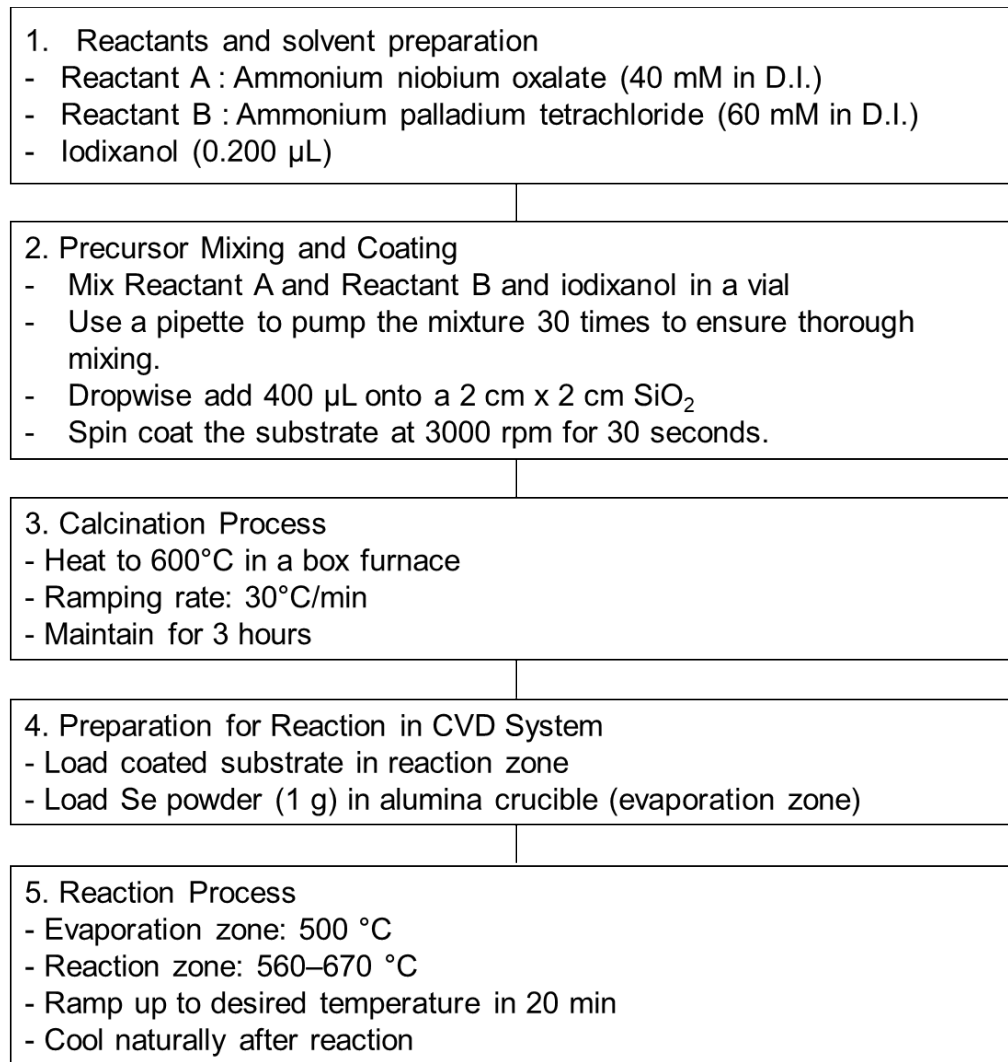

**Fig. S1** Schematic diagram of the  $\text{Nb}_2\text{Pd}_3\text{Se}_8$  nanowire growth using the LPI-CVD process

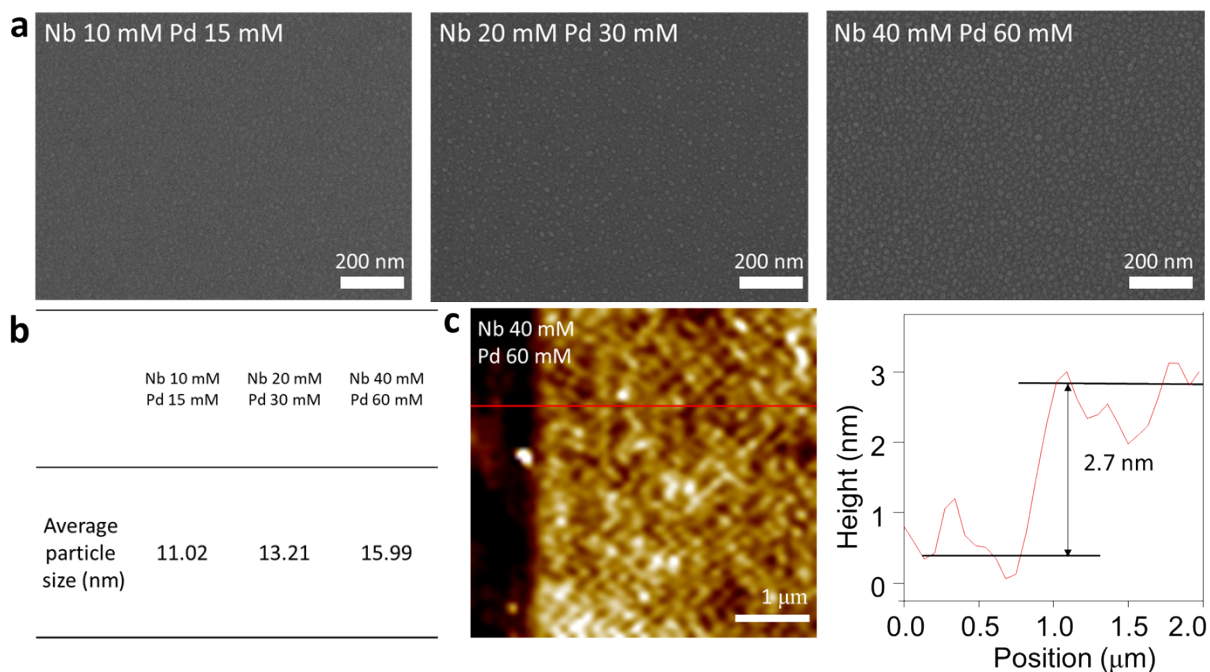

**Fig. S2** Morphology of precursor coated substrate. (a) SEM image of the as-prepared coating with different molar concentrations of Nb: Pd precursor solution. (b) A table showing the average size of the particles based on the molar concentration of the precursor solution. (c) AFM images of the coating with Nb 40 mM and Pd 60 mM precursor solution.

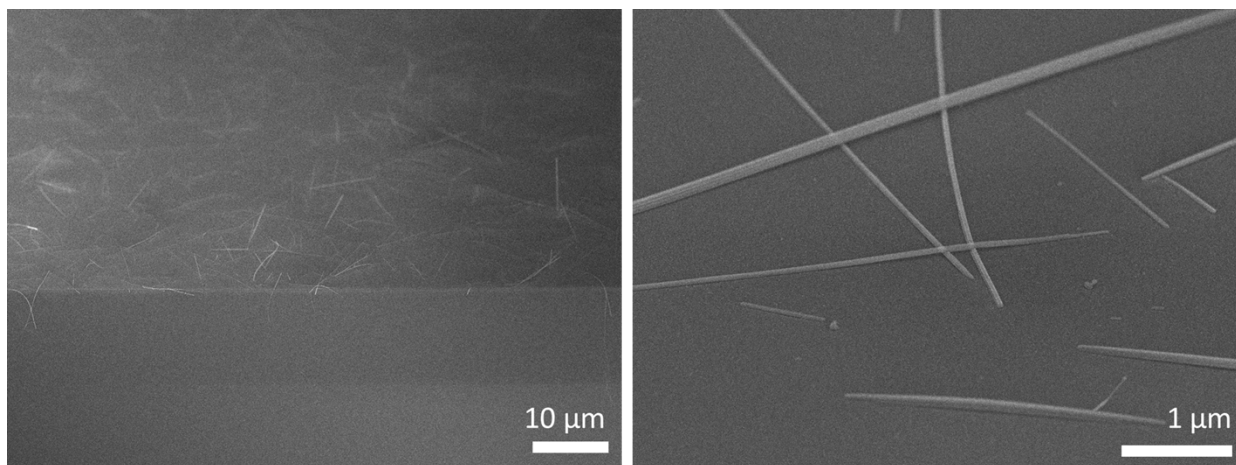

**Fig. S3** Cross section-SEM images of  $\text{Nb}_2\text{Pd}_3\text{Se}_8$  nanowires grown on the substrate.

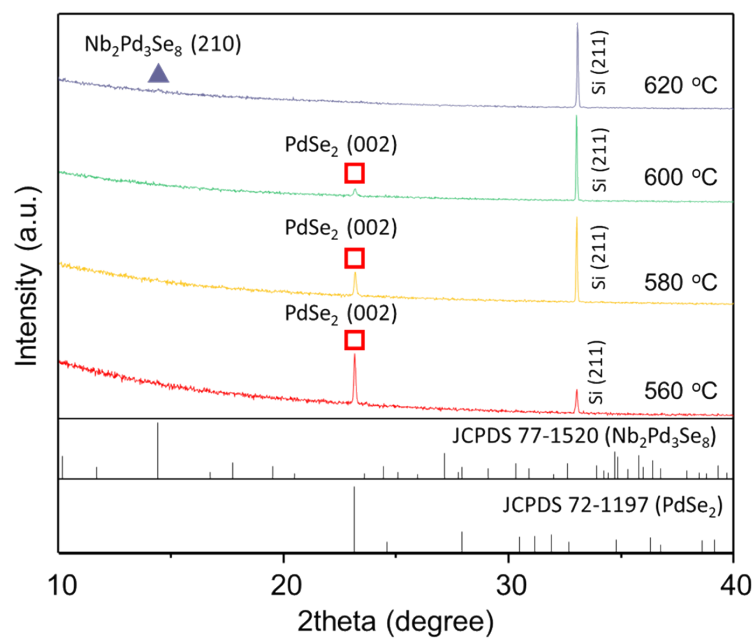

**Fig. S4.** (a) XRD patterns after the LPI-CVD process at 560, 580, 600, and 620 °C

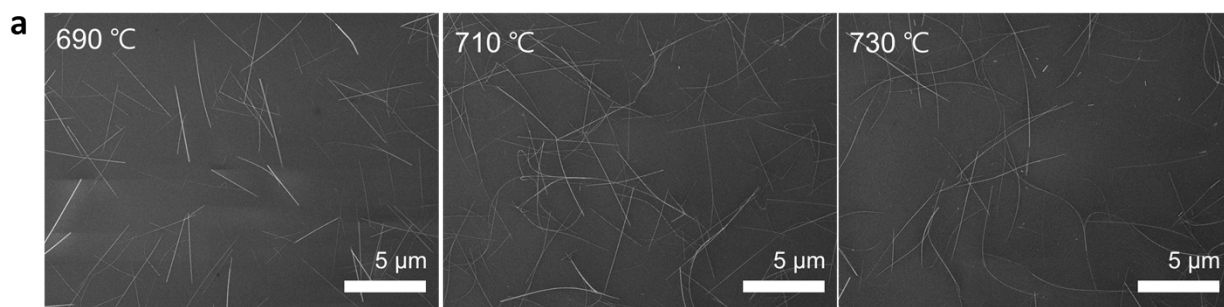

**b**

| Process Temperature (C°) | 630   | 650   | 670   | 690   | 710   | 730   |
|--------------------------|-------|-------|-------|-------|-------|-------|
| Wire length average (nm) | 2.29  | 3.91  | 4.91  | 11.55 | 15.04 | 13.8  |
| Wire width average (μm)  | 70.35 | 75.91 | 58.84 | 40.57 | 51.14 | 52.68 |
| Aspect ratio             | 32.5  | 51.4  | 83.4  | 284.7 | 292.7 | 263.5 |

**Fig. S5** (a) SEM images of  $\text{Nb}_2\text{Pd}_3\text{Se}_8$  synthesized by LPI-CVD at 690 , 710, 730 °C (b) Process temperature-dependent wire length, width, and aspect ratio of CVD grown  $\text{Nb}_2\text{Pd}_3\text{Se}_8$  nanowires..

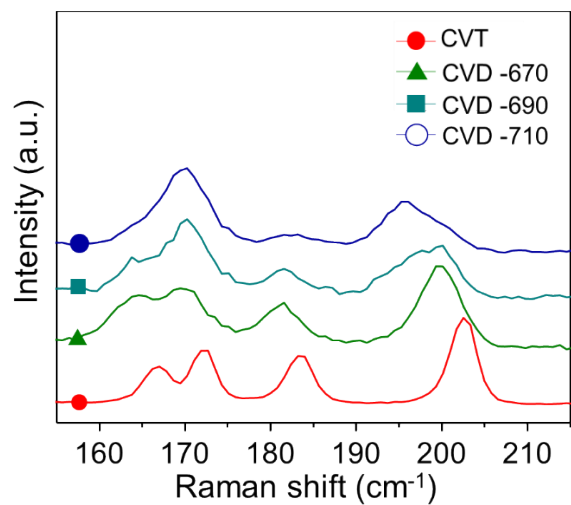

**Fig. S6** Comparison of Raman spectra for different synthesis methods of Nb<sub>2</sub>Pd<sub>3</sub>Se<sub>8</sub>.



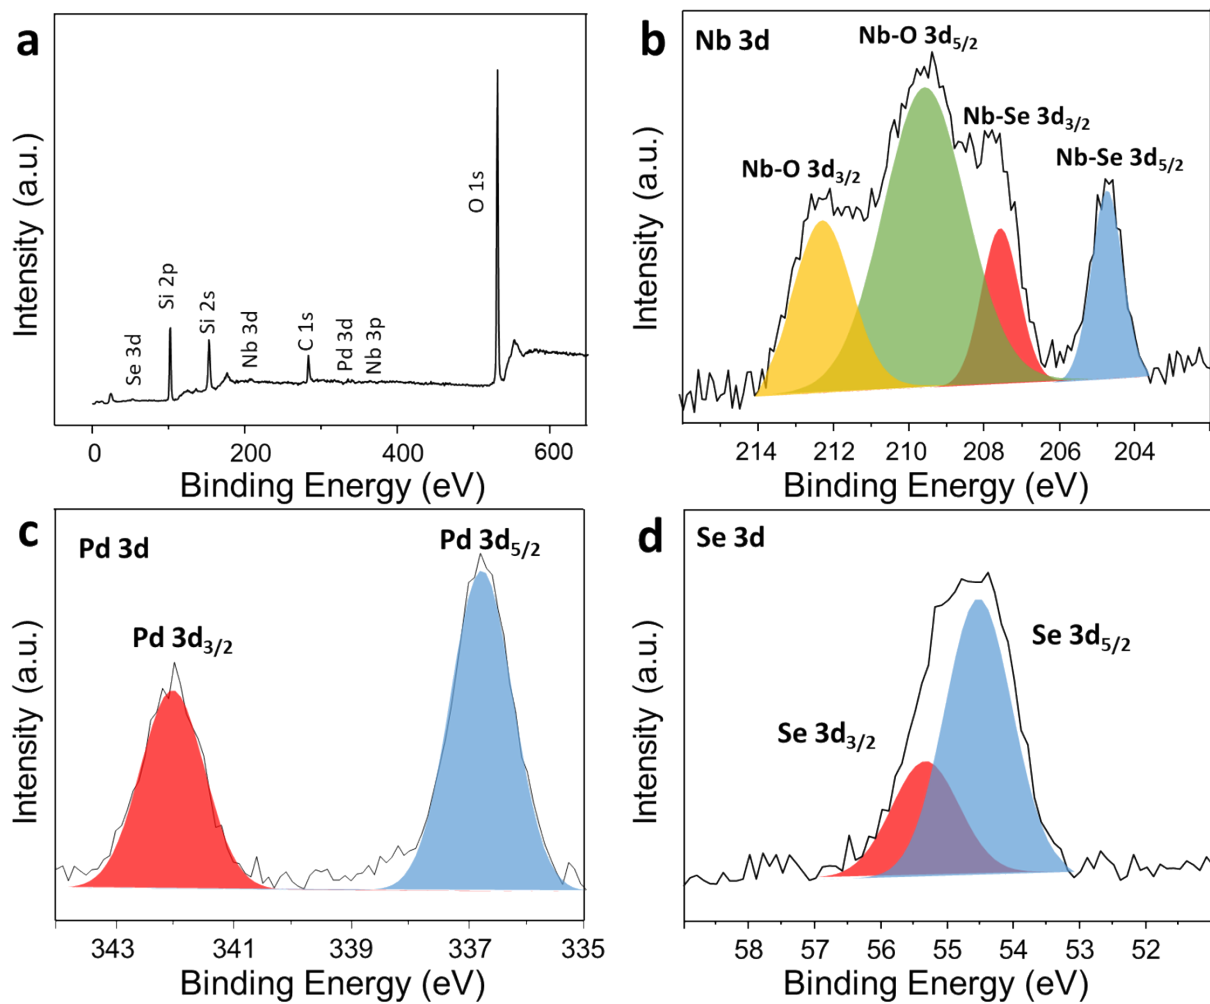

**Fig. S7** XPS analysis of Nb<sub>2</sub>Pd<sub>3</sub>Se<sub>8</sub> on SiO<sub>2</sub> (a) XPS spectrum of CVD-grown Nb<sub>2</sub>Pd<sub>3</sub>Se<sub>8</sub>. (b)-(d) Core level XPS spectra of the Nb 3d, Pd 3d and Se 3d regions.

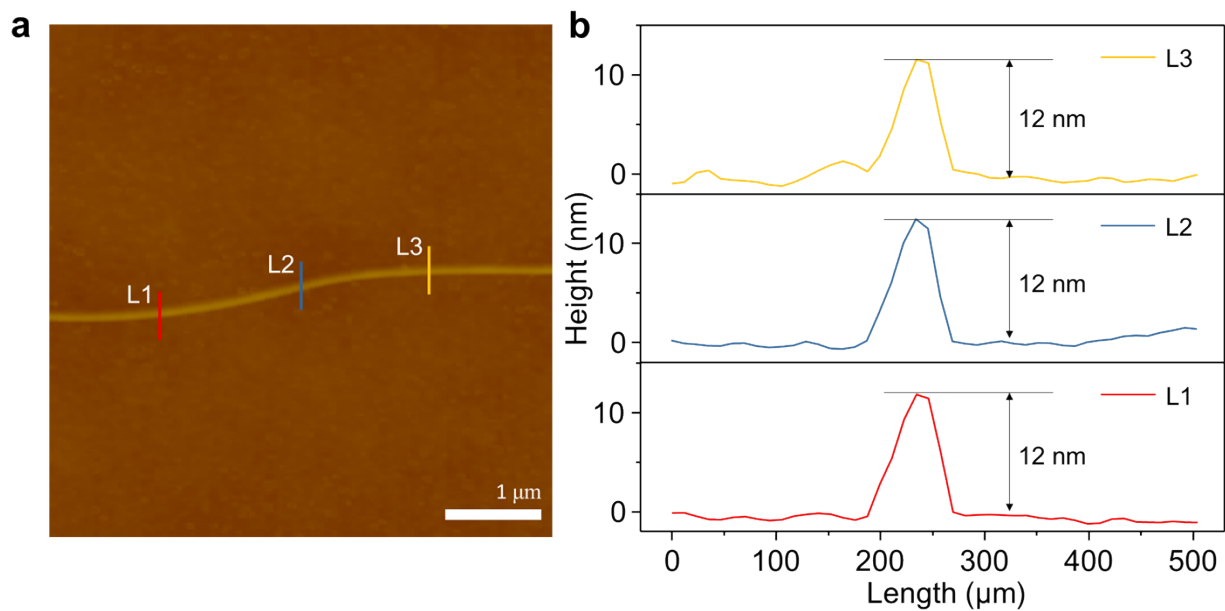

**Fig. S8** Dimension of FET device channel material. (a) AFM image and (b) height profile.
